# Supplementary material for: Visualizing Arc protein dynamics and localization in the mammalian brain using AAV-mediated in situ gene labeling
Source: Front Mol Neurosci. 2023 Jun 15;16:1140785. doi: 10.3389/fnmol.2023.1140785 (PMC10321715; doi:10.3389/fnmol.2023.1140785)
Supplement: Supplementary file 2 [file Table_2.xlsx]

## Sheet: Primers
		CONSTRUCTS
		ArcHiTi exp_1
		AAVs| sg2[-],GFP
		fwd gRNA LongPAM1 HiTi GFP	ACCtcggtgctgcggctccgaac		step I gRNA
		rev gRNA LongPAM1 HiTi GFP	AACgttcggagccgcagcaccgac
		fwd LongPAM1 HiTi GFP	tttctagactgcagagggccctcggtgctgcggctccgaacaggCGCGCCACCATGGTGAGC		step II tag
		rev LongPAM1 HiTi GFP	ggcatggacgagctgtacaaggtcggtgctgcggctccgaacaggcacgtgcggaccgagcggccgca
		AAVs| sg2[-],mCherry
		fwd gRNA LongPAM1 HiTi mCherry	ACCtcggtgctgcggctccgaac		step I gRNA
		rev gRNA LongPAM1 HiTi mCherry	AACgttcggagccgcagcaccgac
		fwd LongPAM1 HiTi mCherry	tttctagactgcagagggccctcggtgctgcggctccgaacaggCGCGCCACCATGGTGAGC		step II tag
		rev LongPAM1 HiTi mCherry	ggcatggacgagctgtacaaggtcggtgctgcggctccgaacaggcacgtgcggaccgagcggccgca
		AAVs| sgLuc,GFP,V1
		fwd gRNA LongPAM1 HiTi GFP	ACCACAACTTTACCGACCGCGCC		step I gRNA
		rev gRNA LongPAM1 HiTi GFP	AACGGCGCGGTCGGTAAAGTTGT
		fwd LongPAM1 HiTi GFP	tttctagactgcagagggccctcggtgctgcggctccgaacaggCGCGCCACCATGGTGAGC		step II tag
		rev LongPAM1 HiTi GFP	ggcatggacgagctgtacaaggtcggtgctgcggctccgaacaggcacgtgcggaccgagcggccgca
		AAVs| sgLuc,mCherry,V1
		fwd gRNA LongPAM1 HiTi GFP	ACCACAACTTTACCGACCGCGCC		step I gRNA
		rev gRNA LongPAM1 HiTi GFP	AACGGCGCGGTCGGTAAAGTTGT
		fwd LongPAM1 HiTi mCherry	tttctagactgcagagggccctcggtgctgcggctccgaacaggCGCGCCACCATGGTGAGC		step II tag
		rev LongPAM1 HiTi mCherry	ggcatggacgagctgtacaaggtcggtgctgcggctccgaacaggcacgtgcggaccgagcggccgca
		ArcHiTi exp_2
		AAVs| sg1[+],mCherry
		fwd gRNA ShortPAM1 HiTi	ACCgaggagttcttagcctgtt		step I gRNA
		rev gRNA ShortPAM1 HiTi	AACaacaggctaagaactcctc
		fwd mCherry ShortPAM1 HiTi	tttctagactgcagagggccccgaacaggctaagaactcctcCGCGCCACCATGGTGAGC		step II tag
		rev mCherry ShortPAM1 HiTi	tgcggccgctcggtccgcacgaggagttcttagcctgttcggCTTGTACAGCTCGTCCATGCC
		AAVs| sg9[+],mCherry
		fwd gRNA ShortPAM4 HiTi	accGAGCTGGACCATATGACCAC		step I gRNA
		rev gRNA ShortPAM4 HiTi	aacGTGGTCATATGGTCCAGCTC
		fwd mCherry ShortPAM4 HiTi	tttctagactgcagagggccccggtggtcatatggtccagctcggGTGAGCAAGGGCGAGGAG		step II tag
		rev mCherry ShortPAM4 HiTi	tgcggccgctcggtccgcacgagctggaccatatgaccaccgggtcatatggtccagctccatCTTGTACAGCTCGTCCATGC
		AAVs | sgLuc,GFP,V2
		Luciferase gRNA fwd	ACCACAACTTTACCGACCGCGCC		step I gRNA
		Luciferase gRNA rev	AACGGCGCGGTCGGTAAAGTTGT
		fwd Luci-LuciTargetS1-GFP-HiTi			step II tag
		rev Luci-LuciTargetS1-GFP-HiTi
		AAVs | sgLuc,mCherry,V2
		Luciferase gRNA fwd	ACCACAACTTTACCGACCGCGCC		step I gRNA
		Luciferase gRNA rev	AACGGCGCGGTCGGTAAAGTTGT
		fwd Luci-LuciTargetS1-mCherry-HiTi	tttctagactgcagagggccccgGGCGCGGTCGGTAAAGTTGTcgcgccaccatggtgagc		step II tag
		rev Luci-LuciTargetS1-mCherry-HiTi	tgcggccgctcggtccgcacACAACTTTACCGACCGCGCCcggcttgtacagctcgtccatgcc
		AAVs | sg2[-],mCherry-oaHDR
		fwd gRNA LongPAM1 SATI	ACCgtcggtgctgcggctccgaac		I step gRNA
		rev gRNA LoingPAM1 SATI	AACgttcggagccgcagcaccgac
		fwd mCherry LongPAM1 SATI	tttctagactgcagagggccgtcggtgctgcggctccgaacaggCGCGCCACCATGGTGAGC		II step
		rev mCherry LongPAM1 SATI	tgcggctccgCTTGTACAGCTCGTCCATGCC
		fwd gen Arc I	GCCTCAGAGGAGTTCTTAGCC		III step
		rev gen Arc I	CACCCACTCTGATGCCACTT
		fwd gen Arc II	CTGCCTCAGAGGAGTTCTTAGC
		rev gen Arc II	TCTGATGCCACTTCACTCCAC
		fwd Arc oaHDR SATI	gctgtacaagCGGAGCCGCAGCACCGAC		IV step
		rev Arc oaHDR SATI	tgcggccgctcggtccgcacTCCTGGAAAGTGGACTTGGTTCTGC
		PCR validation in the Arc gene
		AAVs | sg2[-],GFP + Cas9
		#1 oMA56 Arc fwd	GCTTCTGCCTCAGAGGAGTTCT	5'
		#2 oMA57 GFP rev	GCCCTCGAACTTCACCTCG
		#3 oMA59 GFP fwd	GGACGACGGCAACTACAAGA	3'
		#4 oMA58 Arc rev	GTGGTCATATGGTCCAGCTCC
		AAVs | sg2[-],mCherry + Cas9
		AAVs| sg1[+],mCherry + Cas9
		AAVs| sg9[+],mCherry + Cas9
		AAVs | sg2[-],mCherry-oaHDR + Cas9 (only 5')
		#5 oMA53 Arc fwd	GTGTCTCCGGTCCCCAAAAT	5'
		#6 oMA52 mCherry rev	CCATGTTATCCTCCTCGCCC
		#7 oMA54 mCherry fwd	CGGCGGCATGGACGAG	3'
		#8 oMA55 Arc rev	CCTCTCCAGACGGTAGAAGAC
